# Supplementary material for: Two state “ON–OFF” NLO switch based on coordination complexes of iron and cobalt containing isomeric ligand: a DFT study
Source: Royal Society of Chemistry journal article supplement (doi:10.1039/d2ra03867f), 2022-01-01
Supplement: d2ra03867f1.pdf [file d2ra03867f1.pdf]

## **Two state “ON-OFF” NLO switch based on coordination complexes of iron and cobalt containing isomeric ligand: A DFT study**

Tamseela Bibi<sup>a</sup>, Tabish Jadoon<sup>a,b</sup>, Khurshid Ayub<sup>a</sup>

a Department of Chemistry, COMSATS University Abbottabad Campus, 22060, Pakistan

b Department of Chemistry, GPGC No.1 Abbottabad, KPK, Pakistan

### **Corresponding Author**

Khurshid Ayub

Tel: +92-992-383591

Fax: +92-992-383441

Email: [Khurshid@cuiatd.edu.pk](mailto:Khurshid@cuiatd.edu.pk)

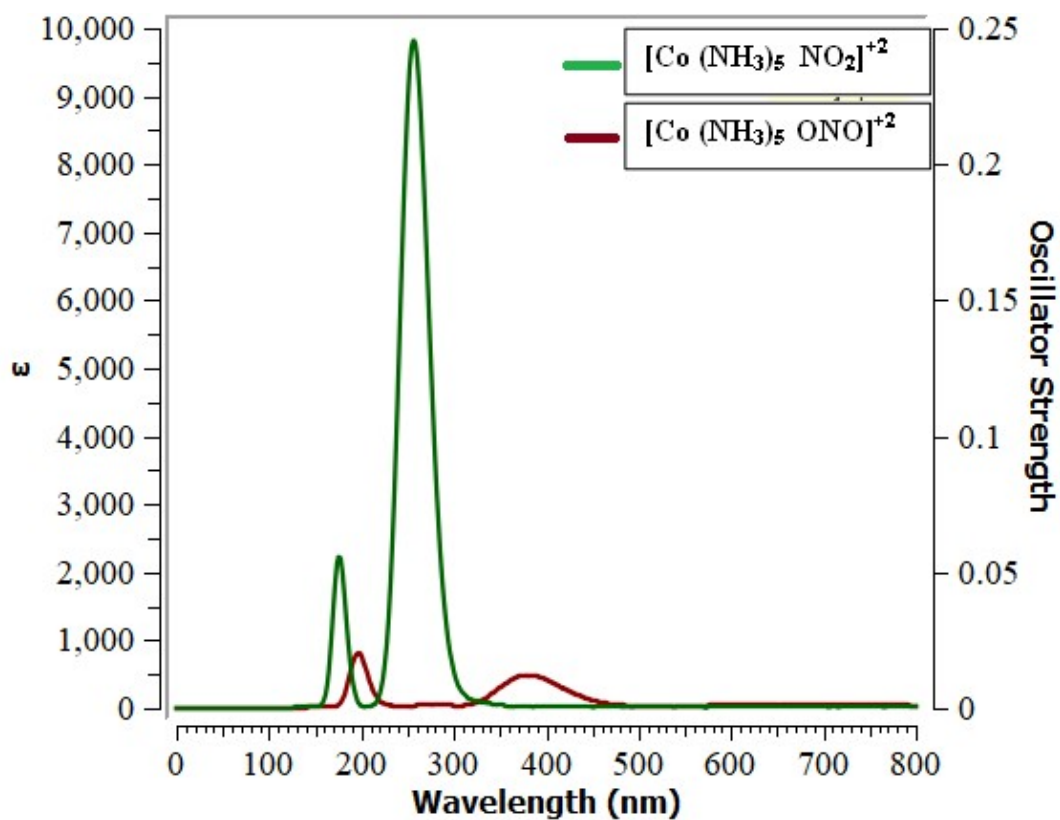

Figure S1: UV-Visible absorption spectra of ligand complexes of  $\text{NO}_2$

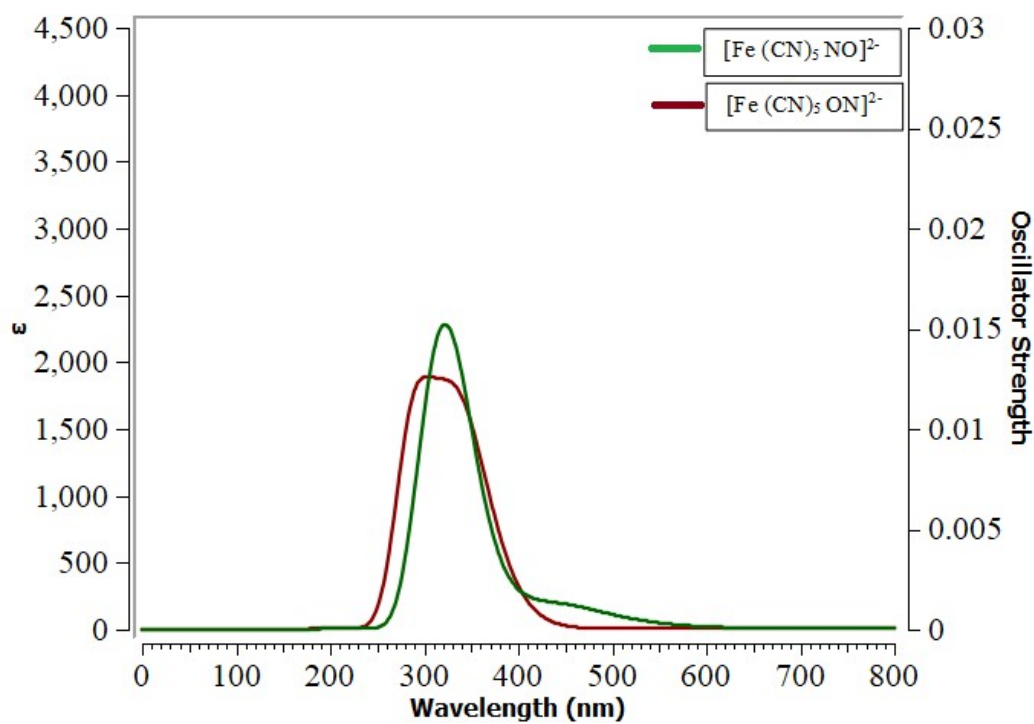

Figure S2: UV-Visible absorption spectra of ligand complexes of  $\text{NO}$

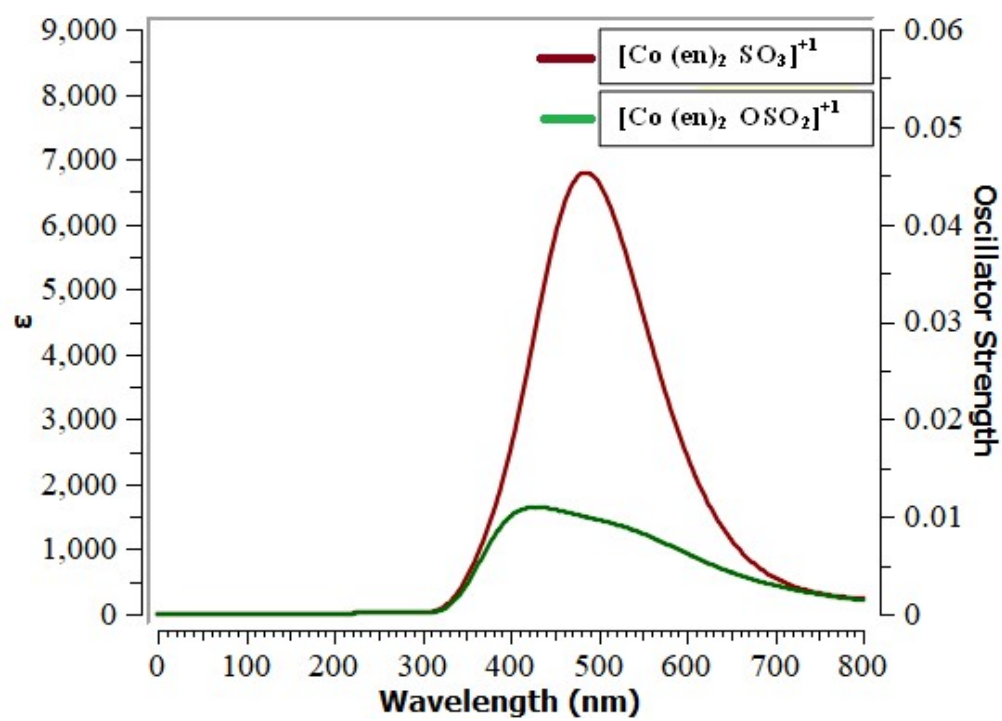

Figure S3: UV-Visible absorption spectra of ligand complexes of  $\text{SO}_3$
